# Supplementary material for: Lipidated apolipoprotein E4 structure and its receptor binding mechanism determined by a combined cross-linking coupled to mass spectrometry and molecular dynamics approach
Source: PubMed Central journal article supplement (PMC6033463; doi:10.1371/journal.pcbi.1006165), 2018-06-22
Supplement: pcbi.1006165.s008.pdf [file pcbi.1006165.s008.pdf]

| Lys 1 <sup>a</sup> |            | Lys 2 <sup>a</sup> |        | Peptide 1 - Peptide 2 <sup>b</sup>       | <i>xQuest</i> <sup>c</sup> | <i>deltaS</i> <sup>d</sup> |
|--------------------|------------|--------------------|--------|------------------------------------------|----------------------------|----------------------------|
| Lys1               | N terminus | Lys95              | NTD H3 | MKVEQAVETEPEPELR - LSKELQAAQAR           | 29.33                      | 0                          |
| Lys1               | N terminus | Lys233             | CTD    | MKVEQAVETEPEPELR - LDEVKEQVAEVR          | 21.44                      | 66                         |
| Lys1               | N terminus | Lys233             | CTD    | MKVEQAVETEPEPELR - DRLDEVKEQVAEVR        | 27.46                      | 0                          |
| Lys1               | N terminus | Lys242             | CTD    | MKVEQAVETEPEPELR - AKLEEQAQQIR           | 27.43                      | 69                         |
| Lys69              | NTD H2     | Lys75              | NTD H2 | ALMDETMKELK - AYKSELEEQLTPVAEETR         | 22.03                      | 0                          |
| Lys69              | NTD H2     | Lys95              | NTD H3 | ALMDETMKELK - LSKELQAAQAR                | 27.15                      | 86                         |
| Lys72              | NTD H2     | Lys95              | NTD H3 | ELKAYK - LSKELQAAQAR                     | 29.34                      | 55                         |
| Lys72              | NTD H2     | Lys233             | CTD    | ELKAYK - LDEVKEQVAEVR                    | 27.72                      | 51                         |
|                    |            |                    |        | ELKAYK - DRLDEVKEQVAEVR                  | 25.63                      | 33                         |
| Lys72              | NTD H2     | Lys242             | CTD    | ELKAYK - AKLEEQAQQIR                     | 28.83                      | 47                         |
|                    |            |                    |        | ALMDETMKELKAYK - AKLEEQAQQIR             | 26.09                      | 0                          |
| Lys72              | NTD H2     | Lys282             | CTD    | ELKAYK - QWAGLVEKVQAAVGTSAAPVPSDNHG      | 21.91                      | 0                          |
| Lys75              | NTD H2     | Lys95              | NTD H3 | AYKSELEEQLTPVAEETR - LSKELQAAQAR         | 26.28                      | 0                          |
| Lys75              | NTD H2     | Lys143             | NTD H4 | AYKSELEEQLTPVAEETR - KLR                 | 21.31                      | 0                          |
| Lys75              | NTD H2     | Lys242             | CTD    | AYKSELEEQLTPVAEETR - AKLEEQAQQIR         | 21.96                      | 0                          |
| Lys95              | NTD H3     | Lys143             | NTD H4 | LSKELQAAQAR - KLR                        | 28.31                      | 42                         |
| Lys95              | NTD H3     | Lys157             | NTD H4 | LSKELQAAQAR - DADDLQKR                   | 30.06                      | 67                         |
| Lys95              | NTD H3     | Lys233             | CTD    | LSKELQAAQAR - LDEVKEQVAEVR               | 28.43                      | 71                         |
| Lys95              | NTD H3     | Lys242             | CTD    | LSKELQAAQAR - AKLEEQAQQIR                | 31.13                      | 62                         |
| Lys95              | NTD H3     | Lys262             | CTD    | LSKELQAAQAR - LKSWFEPLVEDMQR             | 19.58                      | 71                         |
| Lys95              | NTD H3     | Lys282             | CTD    | LSKELQAAQAR - QWAGLVEKVQAAVGTSAAPVPSDNHG | 21.30                      | 0                          |
| Lys143             | NTD H4     | Lys233             | CTD    | KLR - DRLDEVKEQVAEVR                     | 29.51                      | 42                         |
|                    |            |                    |        | KLR - LDEVKEQVAEVR                       | 27.45                      | 44                         |

|        |        |        |     |                              |       |    |
|--------|--------|--------|-----|------------------------------|-------|----|
| Lys157 | NTD H4 | Lys233 | CTD | DADDLQKR - LDEVKEQVAEVR      | 33.62 | 61 |
| Lys157 | NTD H4 | Lys242 | CTD | DADDLQKR - AKLEEQAQQIR       | 33.89 | 0  |
| Lys233 | CTD    | Lys242 | CTD | LDEVKEQVAEVR - AKLEEQAQQIR   | 35.07 | 64 |
|        |        |        |     | DRLDEVKEQVAEVR - AKLEEQAQQIR | 29.65 | 55 |
