# Supplementary material for: Lipidated apolipoprotein E4 structure and its receptor binding mechanism determined by a combined cross-linking coupled to mass spectrometry and molecular dynamics approach
Source: PubMed Central journal article supplement (PMC6033463; doi:10.1371/journal.pcbi.1006165), 2018-06-22
Supplement: pcbi.1006165.s009.pdf [file pcbi.1006165.s009.pdf]

|                              | Reasoning                                                                                                          | Constraints were applied to res.–res. <sup>a</sup>                                                                                                                                                         | Distance constraint (in Å) |     |     |
|------------------------------|--------------------------------------------------------------------------------------------------------------------|------------------------------------------------------------------------------------------------------------------------------------------------------------------------------------------------------------|----------------------------|-----|-----|
|                              |                                                                                                                    |                                                                                                                                                                                                            | + Å                        | - Å |     |
| <b>Opened hairpin model</b>  |                                                                                                                    |                                                                                                                                                                                                            |                            |     |     |
| <b>A</b>                     | Hinge at 186–193 by zipping NT helices 3 and 4 with the CT domain                                                  | 90–284, 94–281, 98–277, 101–273, 105–270, 112–262, 116–258, 124–250, 126–250, 130–247, 134–243, 138–240, 143–236, 146–233, 153–228, 157–219, 161–215, 164–211, 171–211, 175–208, 179–204, 183–198, 185–194 | 6                          | 4   | 4   |
| <b>B</b>                     | NT helix 2 paired with NT helix 3 and outside of the lipid disc                                                    | 57–110, 65–102, 76–91                                                                                                                                                                                      | 6                          | 4   | 4   |
| <b>C</b>                     | Helices 1 and 2 bundled                                                                                            | 26–70 <sup>b</sup>                                                                                                                                                                                         | 6.25                       | 0.3 | 0.2 |
|                              |                                                                                                                    | 29–67 <sup>b</sup>                                                                                                                                                                                         | 5.25                       | 0.5 | 0.3 |
|                              |                                                                                                                    | 33–63 <sup>b</sup>                                                                                                                                                                                         | 5.5                        | 0.6 | 0.7 |
|                              |                                                                                                                    | 36–60 <sup>b</sup>                                                                                                                                                                                         | 6.5                        | 0.5 | 0.8 |
|                              |                                                                                                                    | 40–56 <sup>b</sup>                                                                                                                                                                                         | 6                          | 0.9 | 1.2 |
|                              |                                                                                                                    | 51–56 <sup>b</sup>                                                                                                                                                                                         | 9                          | 0.8 | 0.3 |
| <b>D</b>                     | Discoidal curvature                                                                                                | 189–287                                                                                                                                                                                                    | 105                        | 5   | 5   |
|                              |                                                                                                                    | 189–235, 235–287                                                                                                                                                                                           | 70                         | 5   | 5   |
| <b>E</b>                     | CT end outside the lipid disc                                                                                      | 85–292                                                                                                                                                                                                     | 6                          | 4   | 4   |
| <b>Compact hairpin model</b> |                                                                                                                    |                                                                                                                                                                                                            |                            |     |     |
| <b>F</b>                     | Hinge at 186–193 by zipping NT helix 4 with the CT domain                                                          | 130–248, 138–241, 142–237, 145–233, 153–226, 157–222, 160–219, 167–211, 175–207, 183–198, 185–194                                                                                                          | 6                          | 4   | 4   |
| <b>G</b>                     | NT helix 3 paired with NT helix 4 and NT helix 2 paired with CT domain / NT helices 3 and 2 outside the lipid disc | 94–158, 102–150, 113–138, 120–131, 58–242, 62–238, 69–231, 77–226                                                                                                                                          | 6                          | 4   | 4   |
| <b>H</b>                     | Helices 1–3 bundled                                                                                                | 26–70 <sup>b</sup>                                                                                                                                                                                         | 6.25                       | 0.3 | 0.2 |
|                              |                                                                                                                    | 29–67 <sup>b</sup>                                                                                                                                                                                         | 5.25                       | 0.5 | 0.3 |
|                              |                                                                                                                    | 33–63 <sup>b</sup>                                                                                                                                                                                         | 5.5                        | 0.6 | 0.7 |
|                              |                                                                                                                    | 36–60 <sup>b</sup>                                                                                                                                                                                         | 6.5                        | 0.5 | 0.8 |
|                              |                                                                                                                    | 40–47 <sup>b</sup>                                                                                                                                                                                         | 9                          | 0.9 | 1.6 |
|                              |                                                                                                                    | 40–56 <sup>b</sup>                                                                                                                                                                                         | 6                          | 0.9 | 1.2 |
|                              |                                                                                                                    | 51–56 <sup>b</sup>                                                                                                                                                                                         | 9                          | 0.8 | 0.3 |
|                              |                                                                                                                    | 57–115, 61–112 <sup>b</sup>                                                                                                                                                                                | 6.25                       | 0.5 | 0.5 |
|                              |                                                                                                                    | 64–108 <sup>b</sup>                                                                                                                                                                                        | 5.25                       | 0.5 | 0.5 |
|                              |                                                                                                                    | 68–104 <sup>b</sup>                                                                                                                                                                                        | 8                          | 0.5 | 0.5 |
|                              |                                                                                                                    | 72–101 <sup>b</sup>                                                                                                                                                                                        | 9.25                       | 0.5 | 0.5 |
|                              |                                                                                                                    | 75–97 <sup>b</sup>                                                                                                                                                                                         | 9.75                       | 0.5 | 0.5 |
| 79–93 <sup>b</sup>           | 10.5                                                                                                               | 0.5                                                                                                                                                                                                        | 0.5                        |     |     |
| <b>I</b>                     | Discoidal curvature                                                                                                | 189–287                                                                                                                                                                                                    | 105                        | 5   | 5   |
|                              |                                                                                                                    | 189–235, 235–287                                                                                                                                                                                           | 70                         | 5   | 5   |
| <b>J</b>                     | CT end outside the lipid disc                                                                                      | 270–297                                                                                                                                                                                                    | 6                          | 4   | 4   |
