# Supplementary material for: Lipidated apolipoprotein E4 structure and its receptor binding mechanism determined by a combined cross-linking coupled to mass spectrometry and molecular dynamics approach
Source: PubMed Central journal article supplement (PMC6033463; doi:10.1371/journal.pcbi.1006165), 2018-06-22
Supplement: pcbi.1006165.s010.pdf [file pcbi.1006165.s010.pdf]

| XL     |        | Opened hairpin model <sup>b</sup> |                     | Compact hairpin model <sup>b</sup> |                     |
|--------|--------|-----------------------------------|---------------------|------------------------------------|---------------------|
|        |        | H-to-H <sup>c</sup>               | H-to-T <sup>c</sup> | H-to-H <sup>c</sup>                | H-to-T <sup>d</sup> |
| Lys 1  | Lys 2  | Mon1 / Mon2                       | Mon1 / Mon2         | Mon1 / Mon2                        | Mon1 / Mon2         |
| Lys1   | Lys95  | ✓ / ✗                             | ✗ / ✓               | ✗ / ✓                              | ✓ / ✓               |
| Lys1   | Lys233 | -/-                               | -/-                 | ✗ / ✓                              | ✗ / ✓               |
| Lys1   | Lys242 | -/-                               | -/-                 | ✗ / ✗                              | ✗ / ✗               |
| Lys69  | Lys75  | ✓ / ✓                             | ✓ / ✓               | ✓ / ✓                              | ✓ / ✓               |
| Lys69  | Lys95  | ✓ / ✓                             | ✓ / ✓               | ✓ / ✓                              | ✓ / ✓               |
| Lys72  | Lys95  | ✓ / ✓                             | ✓ / ✓               | ✓ / ✓                              | ✓ / ✓               |
| Lys72  | Lys233 | -/-                               | -/-                 | ✓ / ✓                              | ✓ / ✓               |
| Lys72  | Lys242 | -/-                               | -/-                 | ✓ / ✓                              | ✓ / ✓               |
| Lys72  | Lys282 | ✓ / ✓                             | ✓ / ✓               | -/-                                | -/-                 |
| Lys75  | Lys95  | ✓ / ✓                             | ✓ / ✓               | ✓ / ✓                              | ✓ / ✓               |
| Lys75  | Lys143 | -/-                               | -/-                 | ✓ / ✓                              | ✓ / ✓               |
| Lys75  | Lys242 | -/-                               | -/-                 | ✓ / ✓                              | ✓ / ✓               |
| Lys95  | Lys143 | -/-                               | -/-                 | ✓ / ✓                              | ✓ / ✓               |
| Lys95  | Lys157 | -/-                               | -/-                 | ✓ / ✓                              | ✓ / ✓               |
| Lys95  | Lys233 | -/-                               | -/-                 | ✓ / ✓                              | ✓ / ✓               |
| Lys95  | Lys242 | -/-                               | -/-                 | ✓ / ✓                              | ✓ / ✓               |
| Lys95  | Lys262 | ✗ / ✗                             | ✗ / ✗               | -/-                                | -/-                 |
| Lys95  | Lys282 | ✓ / ✓                             | ✓ / ✓               | -/-                                | -/-                 |
| Lys143 | Lys233 | ✓ / ✓                             | ✓ / ✓               | ✓ / ✓                              | ✓ / ✓               |
| Lys157 | Lys233 | ✓ / ✓                             | ✓ / ✓               | ✓ / ✓                              | ✓ / ✓               |
| Lys157 | Lys242 | ✗ / ✓                             | ✓ / ✗               | ✓ / ✓                              | ✓ / ✓               |
| Lys233 | Lys242 | ✓ / ✓                             | ✓ / ✓               | ✓ / ✓                              | ✓ / ✓               |
