# Supplementary material for: Lipidated apolipoprotein E4 structure and its receptor binding mechanism determined by a combined cross-linking coupled to mass spectrometry and molecular dynamics approach
Source: PubMed Central journal article supplement (PMC6033463; doi:10.1371/journal.pcbi.1006165), 2018-06-22
Supplement: pcbi.1006165.s011.pdf [file pcbi.1006165.s011.pdf]

| <b>ApoE4 (125–185)</b> | <b>LA5</b>          | <b>LA4</b>          |
|------------------------|---------------------|---------------------|
| R136 C <sub>ζ</sub>    | E180 C <sub>δ</sub> |                     |
| K143 N <sub>ε</sub>    | E187 C <sub>δ</sub> |                     |
| K146 N <sub>ε</sub>    | D196 C <sub>γ</sub> |                     |
| K146 N <sub>ε</sub>    | D200 C <sub>γ</sub> |                     |
| R172 C <sub>ζ</sub>    |                     | E147 C <sub>δ</sub> |
| R172 C <sub>ζ</sub>    |                     | E149 C <sub>δ</sub> |
| R172 C <sub>ζ</sub>    |                     | E151 C <sub>δ</sub> |
